# Supplementary material for: Trypsin-Ligand binding affinities calculated using an effective interaction entropy method under polarized force field
Source: PubMed Central journal article supplement (PMC5735144; doi:10.1038/s41598-017-17868-z), 2017-12-18

**Trypsin-Ligand binding affinities calculated using an effective interaction  
entropy method under polarized force field**

Yalong Cong,<sup>§,1</sup> Mengxin Li,<sup>§,1</sup> Guoqiang Feng,<sup>1</sup> Yuchen Li,<sup>1</sup> Xianwei Wang,<sup>2</sup> Lili. Duan,<sup>\*,1</sup>

<sup>1</sup>Shandong Province Key Laboratory of Medical Physics and Image Processing Technology, School  
of Physics and Electronics, Shandong Normal University, Jinan 250014, China

<sup>2</sup>Center for Optics & Optoelectronics Research, College of Science, Zhejiang University of  
Technology, Hangzhou 310023, China

Corresponding author (duanll@sdu.edu.cn;)

<sup>§</sup>Yalong Cong and Mengxin Li contributed equally to this work

**Table S1** 20 groups detailed binding free energy of triple system simulations in AMBER force field during 80 to 90 ns MD simulation for the 1C5T system. All values are in kcal/mol.

|     | $\Delta E_{ele}$ | $\Delta E_{vdw}$ | $\Delta E_{int}$ | $\Delta G_{sol}$ | $-T\Delta S$ | $\Delta G_{bind}$ |
|-----|------------------|------------------|------------------|------------------|--------------|-------------------|
| 1   | -40.90           | -17.68           | -17.99           | 12.73            | 14.65        | -49.19            |
| 2   | -36.35           | -25.62           | -19.79           | 13.98            | 11.68        | -56.1             |
| 3   | -38.42           | -20.39           | -20.61           | 15.98            | 14.91        | -48.53            |
| 4   | -32.91           | -15.22           | -21.32           | 10.94            | 15.86        | -42.65            |
| 5   | -37.23           | -21.87           | -13.65           | 16.06            | 15.23        | -41.46            |
| 6   | -38.50           | -17.41           | -15.47           | 12.88            | 17.57        | -40.93            |
| 7   | -29.01           | -17.40           | -19.80           | 10.70            | 14.81        | -40.7             |
| 8   | -41.13           | -18.18           | -19.22           | 17.16            | 13.90        | -47.47            |
| 9   | -31.80           | -22.43           | -12.81           | 13.77            | 17.86        | -35.41            |
| 10  | -42.46           | -20.84           | -12.71           | 21.40            | 13.97        | -40.64            |
| 11  | -34.62           | -24.71           | -19.50           | 17.45            | 15.50        | -45.88            |
| 12  | -37.84           | -22.26           | -17.53           | 17.41            | 17.29        | -42.93            |
| 13  | -35.89           | -17.58           | -15.25           | 16.13            | 17.27        | -35.32            |
| 14  | -37.52           | -23.77           | -23.69           | 17.07            | 17.30        | -50.61            |
| 15  | -25.85           | -24.69           | -21.03           | 10.89            | 17.33        | -43.35            |
| 16  | -29.62           | -21.39           | -23.91           | 8.45             | 16.24        | -50.23            |
| 17  | -34.72           | -20.32           | -8.77            | 12.61            | 17.72        | -33.48            |
| 18  | -33.92           | -23.09           | -19.22           | 13.30            | 18.60        | -44.33            |
| 19  | -35.76           | -19.07           | -15.31           | 12.79            | 17.42        | -39.93            |
| 20  | -40.27           | -18.64           | -13.74           | 13.75            | 15.71        | -43.19            |
| AVE | -35.74           | -20.63           | -17.57           | 14.27            | 16.04        | -43.63            |
| STD | 4.22             | 2.85             | 3.88             | 2.97             | 1.69         | 5.51              |

**Table S2** 20 groups detailed binding free energy of triple system simulations in PPC force field during 80 to 90 ns MD simulation for the 1C5T system. All values are in kcal/mol.

|     | $\Delta E_{ele}$ | $\Delta E_{vdw}$ | $\Delta E_{int}$ | $\Delta G_{sol}$ | $-T\Delta S$ | $\Delta G_{bind}$ |
|-----|------------------|------------------|------------------|------------------|--------------|-------------------|
| 1   | 67.97            | -39.58           | 0.26             | -38.31           | 21.69        | 12.03             |
| 2   | 79.64            | -42.6            | -29.32           | -40.5            | 32.82        | 0.04              |
| 3   | 95.25            | -49.68           | -27.48           | -43.72           | 22.87        | -2.76             |
| 4   | 88.22            | -49.22           | -9.09            | -45.85           | 21.1         | 5.16              |
| 5   | 89.93            | -41.7            | -3.02            | -48.96           | 17           | 13.25             |
| 6   | 93.14            | -48.54           | -13.06           | -49.7            | 19.5         | 1.34              |
| 7   | 86.46            | -44.98           | -6.82            | -43.05           | 16.93        | 8.54              |
| 8   | 91.39            | -43.87           | -27.71           | -47.02           | 28.13        | 0.92              |
| 9   | 89.06            | -48.25           | -25.8            | -50.11           | 25.79        | -9.31             |
| 10  | 74.86            | -51.87           | -12.7            | -35.42           | 23.74        | -1.39             |
| 11  | 67.47            | -41.5            | -8.32            | -37.52           | 25.33        | 5.46              |
| 12  | 74.87            | -40.93           | -16.35           | -40.79           | 16.25        | -6.95             |
| 13  | 76.49            | -43.91           | -8.85            | -39.8            | 19.99        | 3.92              |
| 14  | 70.29            | -41.45           | -1.2             | -38.05           | 5.98         | -4.43             |
| 15  | 75.16            | -36.81           | -12.04           | -42.7            | 21.86        | 5.47              |
| 16  | 79.32            | -39.31           | -7.16            | -39.02           | 21.07        | 14.9              |
| 17  | 72.24            | -39.81           | -19.36           | -36.29           | 24.68        | 1.46              |
| 18  | 69.6             | -44.03           | 2.4              | -40.69           | 16.8         | 4.08              |
| 19  | 69.7             | -38.08           | -13.26           | -40.07           | 16.64        | -5.07             |
| 20  | 80.67            | -47.13           | -26.8            | -44.26           | 33.44        | -4.08             |
| AVE | 79.59            | -43.66           | -13.28           | -42.09           | 21.58        | 2.14              |
| STD | 8.89             | 4.15             | 9.69             | 4.31             | 6.03         | 6.54              |

**Table S3** 20 groups detailed binding free energy of triple system simulations in AMBER force field during 80 to 90 ns MD simulation for the 1O2J system. All values are in kcal/mol.

|     | $\Delta E_{ele}$ | $\Delta E_{vdw}$ | $\Delta E_{int}$ | $\Delta G_{sol}$ | $-T\Delta S$ | $\Delta G_{bind}$ |
|-----|------------------|------------------|------------------|------------------|--------------|-------------------|
| 1   | 135.42           | -22.79           | -11.53           | -169.96          | 17.23        | -51.63            |
| 2   | 128.12           | -21.63           | -16.9            | -166.95          | 20.89        | -56.47            |
| 3   | 126.90           | -20.32           | -10.57           | -169.7           | 19.86        | -53.83            |
| 4   | 132.18           | -23.78           | -3.97            | -168.73          | 18.98        | -45.32            |
| 5   | 124.13           | -24.2            | 1.61             | -161.24          | 17.86        | -41.84            |
| 6   | 125.13           | -24.42           | 1.95             | -158.98          | 21.57        | -34.75            |
| 7   | 129.14           | -26.09           | 5.97             | -164.54          | 19.91        | -35.61            |
| 8   | 117.23           | -20.58           | -24.48           | -160.58          | 20.84        | -67.57            |
| 9   | 119.04           | -23.37           | -10.47           | -163.49          | 19.55        | -58.74            |
| 10  | 124.52           | -19.67           | -5.85            | -165.7           | 19.81        | -46.89            |
| 11  | 124.23           | -22.63           | -12.73           | -162.64          | 18.9         | -54.87            |
| 12  | 134.39           | -20.09           | -7.45            | -172.47          | 16.81        | -48.81            |
| 13  | 125.23           | -17.43           | -9.22            | -164.82          | 18.93        | -47.31            |
| 14  | 129.08           | -17.01           | -13.37           | -170.55          | 17.72        | -54.13            |
| 15  | 133.49           | -24.03           | -6.14            | -170.31          | 17.66        | -49.33            |
| 16  | 130.32           | -19.77           | -8.17            | -169.06          | 19.2         | -47.48            |
| 17  | 125.00           | -24.47           | -0.06            | -162.02          | 18.41        | -43.14            |
| 18  | 128.58           | -24.56           | -0.79            | -172.21          | 16.11        | -52.87            |
| 19  | 128.52           | -23.11           | -11.53           | -171.43          | 18.34        | -59.21            |
| 20  | 132.37           | -23.82           | -6.42            | -170.96          | 16.86        | -51.97            |
| AVE | 127.65           | -22.19           | -7.51            | -166.82          | 18.77        | -50.10            |
| STD | 4.65             | 2.44             | 6.95             | 4.16             | 1.44         | 7.69              |

**Table S4** 20 groups detailed binding free energy of triple system simulations in PPC force field during 80 to 90 ns MD simulation for the 1O2J system. All values are in kcal/mol.

|     | $\Delta E_{ele}$ | $\Delta E_{vdw}$ | $\Delta E_{int}$ | $\Delta G_{sol}$ | $-T\Delta S$ | $\Delta G_{bind}$ |
|-----|------------------|------------------|------------------|------------------|--------------|-------------------|
| 1   | -81.67           | -13.49           | -20.65           | 43.65            | 22.16        | -50.00            |
| 2   | -64.13           | -9.96            | -24.06           | 29.93            | 25.03        | -43.19            |
| 3   | -47.48           | -16.44           | -22.75           | 17.00            | 22.54        | -47.13            |
| 4   | -63.72           | -15.46           | -19.65           | 23.76            | 21.11        | -53.96            |
| 5   | -60.49           | -15.02           | -13.40           | 22.84            | 15.44        | -50.63            |
| 6   | -44.59           | -19.26           | -11.70           | 17.16            | 26.72        | -31.67            |
| 7   | -50.11           | -18.93           | -13.43           | 23.91            | 15.03        | -43.53            |
| 8   | -54.30           | -12.89           | -26.70           | 18.24            | 22.37        | -53.28            |
| 9   | -52.30           | -15.69           | -23.71           | 23.35            | 25.53        | -42.82            |
| 10  | -61.44           | -24.41           | -19.96           | 27.54            | 25.74        | -52.53            |
| 11  | -61.63           | -21.81           | -19.98           | 25.26            | 32.37        | -45.79            |
| 12  | -57.88           | -12.90           | -18.50           | 24.32            | 20.70        | -44.26            |
| 13  | -61.44           | -18.60           | -35.24           | 30.64            | 21.64        | -63.00            |
| 14  | -50.15           | -19.91           | -12.37           | 20.41            | 20.88        | -41.14            |
| 15  | -54.07           | -17.10           | -21.70           | 22.22            | 23.86        | -46.79            |
| 16  | -58.80           | -18.46           | -17.81           | 27.23            | 21.29        | -46.55            |
| 17  | -53.38           | -11.97           | -15.48           | 18.97            | 25.77        | -36.09            |
| 18  | -64.99           | -10.73           | -16.27           | 27.39            | 19.31        | -45.29            |
| 19  | -65.83           | -13.27           | -18.65           | 32.05            | 23.05        | -42.65            |
| 20  | -54.83           | -17.90           | -18.99           | 29.08            | 12.94        | -49.70            |
| AVE | -58.16           | -16.21           | -19.55           | 25.25            | 22.17        | -46.50            |
| STD | 8.04             | 3.68             | 5.35             | 6.05             | 4.30         | 6.57              |

**Table S5** Binding free energy between trypsin and ligand in AMBER and PPC force field during the 20 additional 10 ns MD simulation for the 1C5T system.  $\Delta H$  represents the total of protein–ligand interaction ( $\langle E_{pl}^{int} \rangle$ ) and the solvation free energy ( $\Delta G_{sol}$ ). All values are in kcal/mol. \*The experimental value is -5.6 kcal/mol.

| Time<br>(1C5T) | AMBER      |              |       |                   |       | PPC        |              |       |                   |       |
|----------------|------------|--------------|-------|-------------------|-------|------------|--------------|-------|-------------------|-------|
|                | $\Delta H$ | $-T\Delta S$ |       | $\Delta G_{bind}$ |       | $\Delta H$ | $-T\Delta S$ |       | $\Delta G_{bind}$ |       |
|                |            | $N_{mode}$   | IE    | $N_{mode}$        | IE    |            | $N_{mode}$   | IE    | $N_{mode}$        | IE    |
| 1              | -36.09     | 18.95        | 27.70 | -17.14            | -8.39 | -39.22     | 18.35        | 31.89 | -20.87            | -7.33 |
| 2              | -35.06     | 16.70        | 27.70 | -18.36            | -7.36 | -38.57     | 16.67        | 31.89 | -21.90            | -6.68 |
| 3              | -35.34     | 15.82        | 27.70 | -19.52            | -7.64 | -37.97     | 15.36        | 31.80 | -22.61            | -6.17 |
| 4              | -35.02     | 13.42        | 27.69 | -21.60            | -7.33 | -39.51     | 17.99        | 31.76 | -21.52            | -7.75 |
| 5              | -36.32     | 16.18        | 27.69 | -20.14            | -8.63 | -38.99     | 17.55        | 31.76 | -21.44            | -7.23 |
| 6              | -34.57     | 16.76        | 27.70 | -17.81            | -6.87 | -38.74     | 19.52        | 31.74 | -19.22            | -7.00 |
| 7              | -37.54     | 19.08        | 27.69 | -18.46            | -9.85 | -38.65     | 17.75        | 31.73 | -20.90            | -6.92 |
| 7              | -36.47     | 16.45        | 27.70 | -20.02            | -8.77 | -37.89     | 18.24        | 31.72 | -19.65            | -6.17 |
| 9              | -36.61     | 17.17        | 27.71 | -19.44            | -8.90 | -39.03     | 16.13        | 31.69 | -22.90            | -7.34 |
| 10             | -37.34     | 18.35        | 27.74 | -18.99            | -9.60 | -39.09     | 16.13        | 31.65 | -22.96            | -7.44 |
| 11             | -36.25     | 16.81        | 27.76 | -19.44            | -8.49 | -39.73     | 16.20        | 31.61 | -23.53            | -8.12 |
| 12             | -34.92     | 16.10        | 27.79 | -18.82            | -7.13 | -38.87     | 16.83        | 31.58 | -22.04            | -7.29 |
| 13             | -35.11     | 19.67        | 27.82 | -15.44            | -7.29 | -38.91     | 17.65        | 31.63 | -21.26            | -7.28 |
| 14             | -36.32     | 17.53        | 27.86 | -18.79            | -8.46 | -38.20     | 16.86        | 31.61 | -21.34            | -6.59 |
| 15             | -37.29     | 16.00        | 27.87 | -21.29            | -9.42 | -38.45     | 18.91        | 31.57 | -19.54            | -6.88 |
| 16             | -34.56     | 16.65        | 27.85 | -17.91            | -6.71 | -39.32     | 16.10        | 31.54 | -23.22            | -7.78 |
| 17             | -35.13     | 17.78        | 27.87 | -17.35            | -7.26 | -39.19     | 15.31        | 31.72 | -23.88            | -7.47 |
| 18             | -35.71     | 17.91        | 27.86 | -17.80            | -7.85 | -38.66     | 14.72        | 31.72 | -23.94            | -6.94 |
| 19             | -35.45     | 17.00        | 27.87 | -18.45            | -7.58 | -39.46     | 17.72        | 31.68 | -21.74            | -7.78 |
| 20             | -36.31     | 17.22        | 27.87 | -19.09            | -8.44 | -40.02     | 16.32        | 32.73 | -23.70            | -7.29 |
| AVE            | -35.87     | 17.08        | 27.77 | -18.79            | -8.10 | -38.92     | 17.02        | 31.75 | -21.91            | -7.17 |
| STD            |            |              |       | 1.42              | 0.93  |            |              |       | 1.44              | 0.52  |

**Table S6** Binding free energy between trypsin and ligand in AMBER and PPC force field during the 20 additional 10 ns MD simulation for the 1O2J system.  $\Delta H$  represents the total of protein–ligand interaction ( $\langle E_{pl}^{int} \rangle$ ) and the solvation free energy ( $\Delta G_{sol}$ ). All values are in kcal/mol. \*The experimental value is -7.8 kcal/mol.

| Time<br>(1O2J) | AMBER      |              |       |                   |       | PPC        |              |       |                   |       |
|----------------|------------|--------------|-------|-------------------|-------|------------|--------------|-------|-------------------|-------|
|                | $\Delta H$ | $-T\Delta S$ |       | $\Delta G_{bind}$ |       | $\Delta H$ | $-T\Delta S$ |       | $\Delta G_{bind}$ |       |
|                |            | $N_{mode}$   | IE    | $N_{mode}$        | IE    |            | $N_{mode}$   | IE    | $N_{mode}$        | IE    |
| 1              | -34.20     | 22.94        | 34.86 | -11.26            | 0.66  | -38.39     | 18.03        | 34.14 | -20.36            | -4.25 |
| 2              | -34.30     | 20.62        | 34.88 | -13.68            | 0.58  | -40.54     | 20.71        | 34.14 | -19.83            | -6.40 |
| 3              | -34.09     | 21.20        | 34.89 | -12.89            | 0.80  | -38.13     | 21.98        | 34.13 | -16.15            | -4.00 |
| 4              | -33.77     | 20.19        | 34.91 | -13.58            | 1.14  | -38.21     | 19.14        | 34.13 | -19.07            | -4.08 |
| 5              | -35.85     | 20.38        | 34.93 | -15.47            | -0.92 | -37.20     | 19.11        | 34.13 | -18.09            | -3.07 |
| 6              | -33.30     | 21.02        | 34.95 | -12.28            | 1.65  | -39.21     | 22.08        | 34.13 | -17.13            | -5.08 |
| 7              | -30.97     | 23.06        | 34.95 | -7.91             | 3.98  | -39.90     | 22.15        | 34.15 | -17.75            | -5.75 |
| 8              | -34.42     | 20.86        | 34.96 | -13.56            | 0.54  | -39.26     | 21.57        | 34.14 | -17.69            | -5.12 |
| 9              | -34.01     | 24.01        | 34.97 | -10.00            | 0.96  | -40.55     | 24.78        | 34.15 | -15.77            | -6.40 |
| 10             | -34.29     | 23.64        | 34.97 | -10.65            | 0.68  | -39.61     | 22.64        | 34.16 | -16.97            | -5.45 |
| 11             | -34.32     | 22.59        | 34.96 | -11.73            | 0.64  | -40.17     | 22.86        | 34.20 | -17.31            | -5.97 |
| 12             | -35.56     | 19.67        | 34.96 | -15.89            | -0.60 | -42.40     | 23.59        | 34.23 | -18.81            | -8.17 |
| 13             | -33.73     | 21.61        | 34.96 | -12.12            | 1.23  | -38.16     | 21.81        | 34.23 | -16.35            | -3.93 |
| 14             | -33.55     | 22.90        | 34.96 | -10.65            | 1.41  | -37.08     | 20.74        | 34.22 | -16.34            | -2.86 |
| 15             | -35.53     | 23.64        | 34.97 | -11.89            | -0.56 | -37.09     | 20.53        | 34.20 | -16.56            | -2.89 |
| 16             | -36.81     | 22.43        | 34.97 | -14.38            | -1.84 | -36.95     | 19.39        | 34.18 | -17.56            | -2.77 |
| 17             | -38.61     | 22.52        | 34.99 | -16.09            | -3.62 | -39.39     | 20.51        | 34.19 | -18.88            | -5.20 |
| 18             | -39.12     | 23.32        | 35.01 | -15.80            | -4.11 | -39.29     | 23.79        | 34.23 | -15.50            | -5.06 |
| 19             | -40.19     | 23.79        | 35.03 | -16.40            | -5.16 | -39.88     | 22.37        | 34.26 | -17.51            | -5.62 |
| 20             | -39.44     | 23.52        | 35.05 | -15.92            | -4.39 | -36.57     | 21.45        | 34.27 | -15.12            | -2.30 |
| AVE            | -35.30     | 22.20        | 34.96 | -13.11            | -0.35 | -38.90     | 21.46        | 34.18 | -17.44            | -4.72 |
| STD            |            |              |       | 2.38              | 2.35  |            |              |       | 1.42              | 1.51  |

**Fig. S1** The root-mean-square deviation (RMSD) of the backbone atoms relative to the corresponding native structure during the 200 ns MD simulation. The upper part of the figure is system 1C5T in AMBER (black) and PPC (red); and the lower part of the figure is system 1O2J.

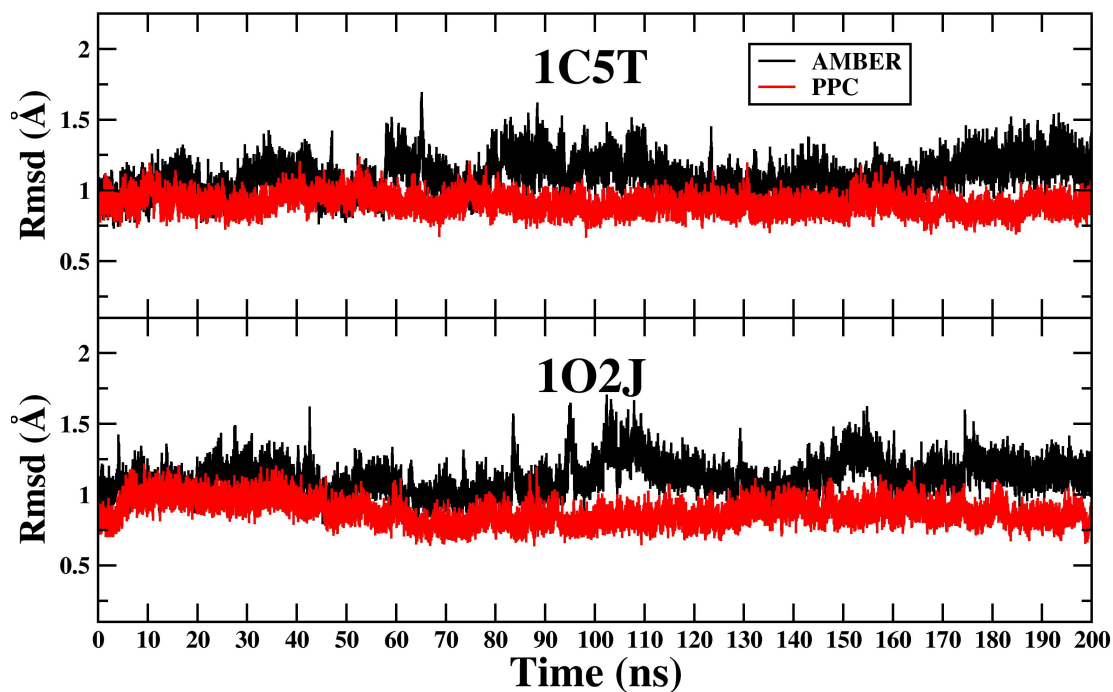

**Fig. S2** The binding free energy distribution of 20 sets of results for 1C5T system calculated by IE and nmode method under PPC and AMBER.

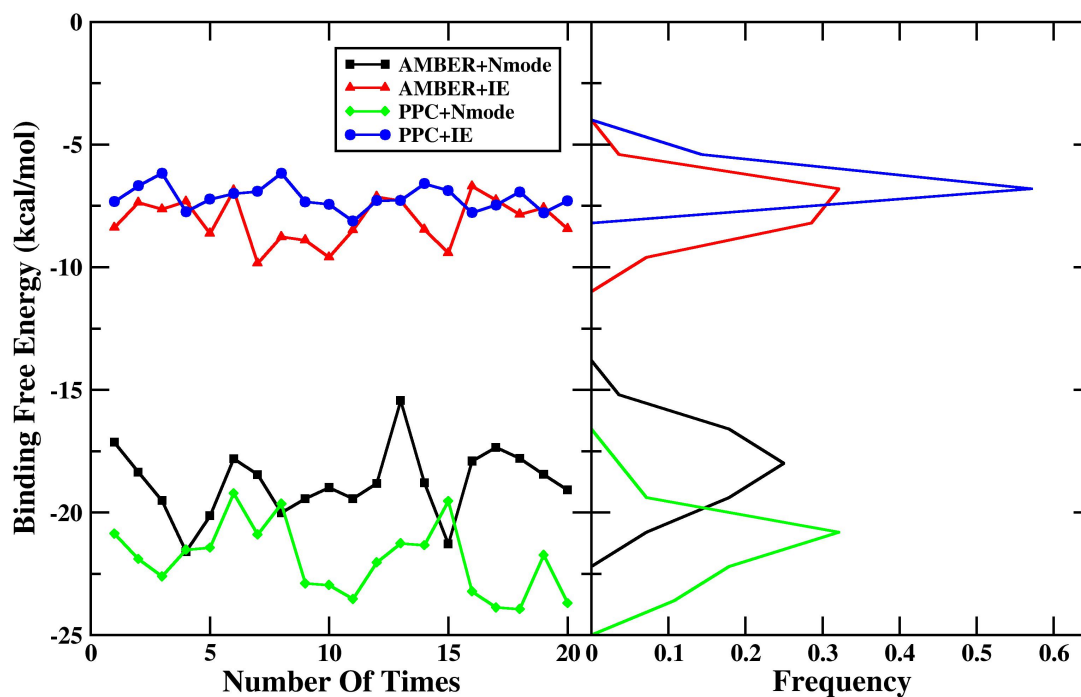



**Fig. S3** The binding free energy distribution of 20 sets of results for 1O2J system calculated by IE and nmode method under PPC and AMBER.

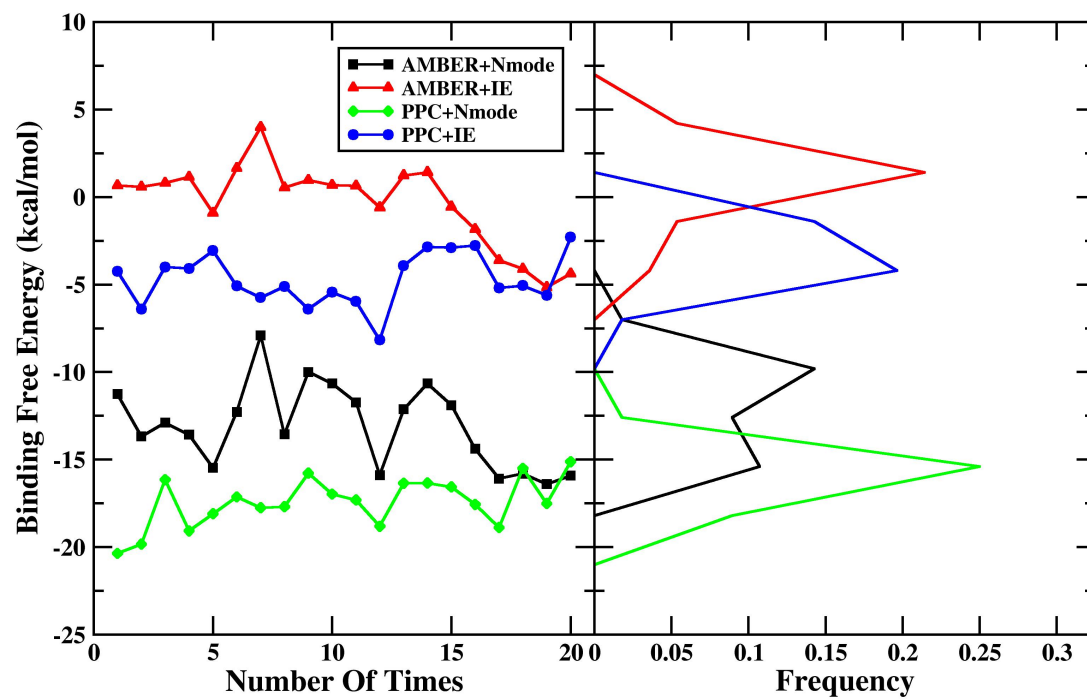

Supplement: 41598_2017_17868_MOESM1_ESM.pdf [file 41598_2017_17868_MOESM1_ESM.pdf]
